# Supplementary material for: Synthesis, crystal structure and magnetic properties of dinuclear NiIILnIII complexes based on a flexible polydentate ligand
Source: Royal Society of Chemistry journal article supplement (doi:10.1039/c3dt50818h), 2013-01-01
Supplement: c3dt50818h.pdf [file c3dt50818h.pdf]

# Synthesis, crystal structure and magnetic properties of dinuclear Ni<sup>II</sup>Ln<sup>III</sup> complexes based on the flexible polydentate ligand

Qi-Wei Xie<sup>a</sup>, Shu-Qi Wu<sup>a</sup>, Cai-Ming Liu<sup>b</sup>, Ai-Li Cui<sup>a</sup> and

Hui-Zhong Kou,<sup>†a</sup>

<sup>†a</sup> *Department of Chemistry, Tsinghua University, Beijing 100084, P. R. China.*

E-mail: [kouhz@mail.tsinghua.edu.cn](mailto:kouhz@mail.tsinghua.edu.cn).

<sup>b</sup> *Beijing National Laboratory for Molecular Sciences, Center for Molecular Science, Institute of Chemistry, Chinese Academy of Sciences, Beijing 100190, P. R. China.*

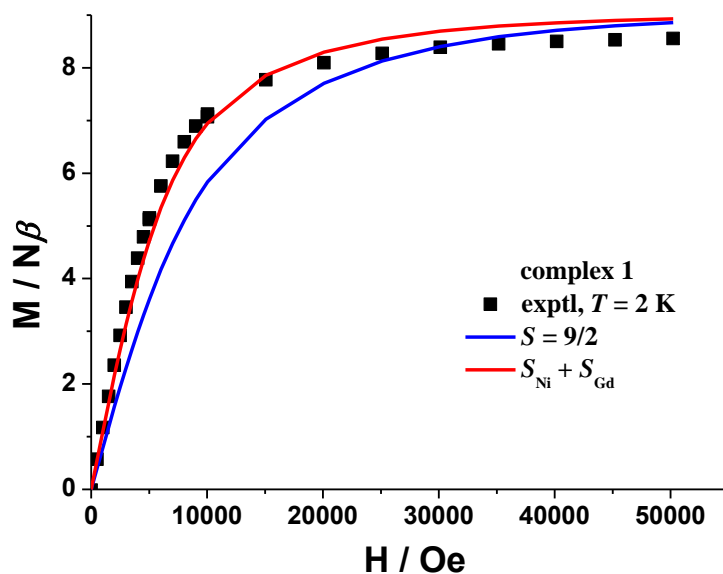

Fig. S1. Field dependence of magnetization for complex 1 at 2.0 K.

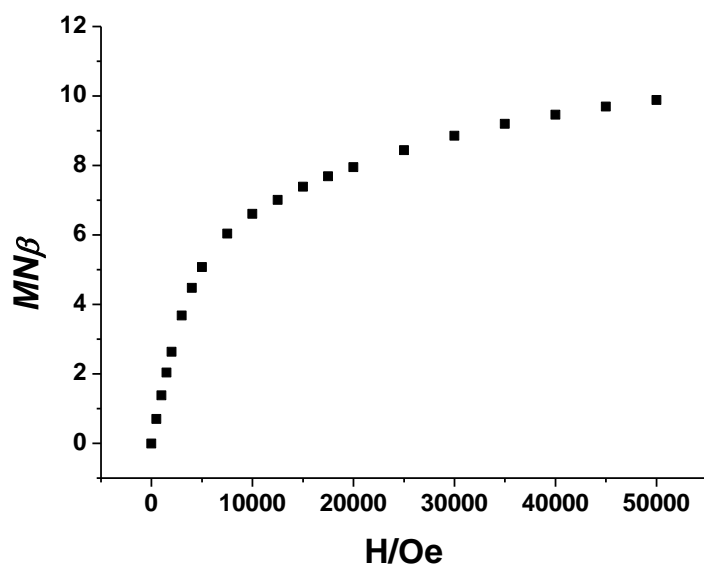

**Fig. S2.** Field dependence of magnetization for complex 2 at 2.0 K.

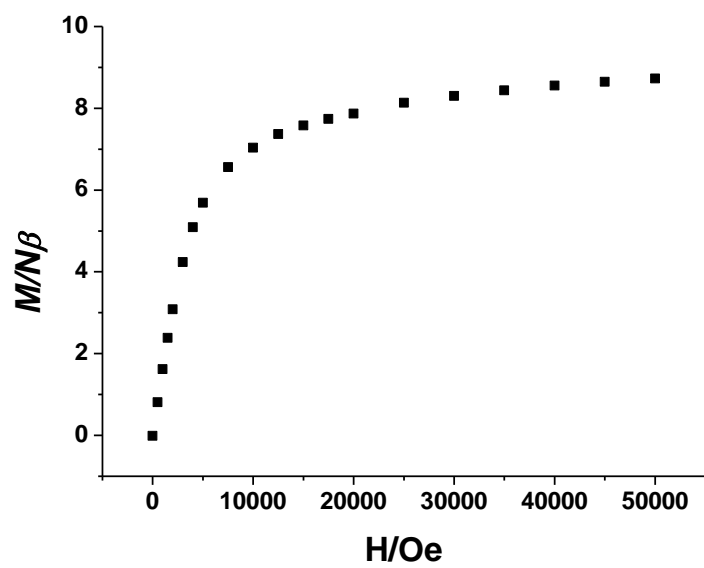

**Fig. S3.** Field dependence of magnetization for complex 3 at 2.0 K.

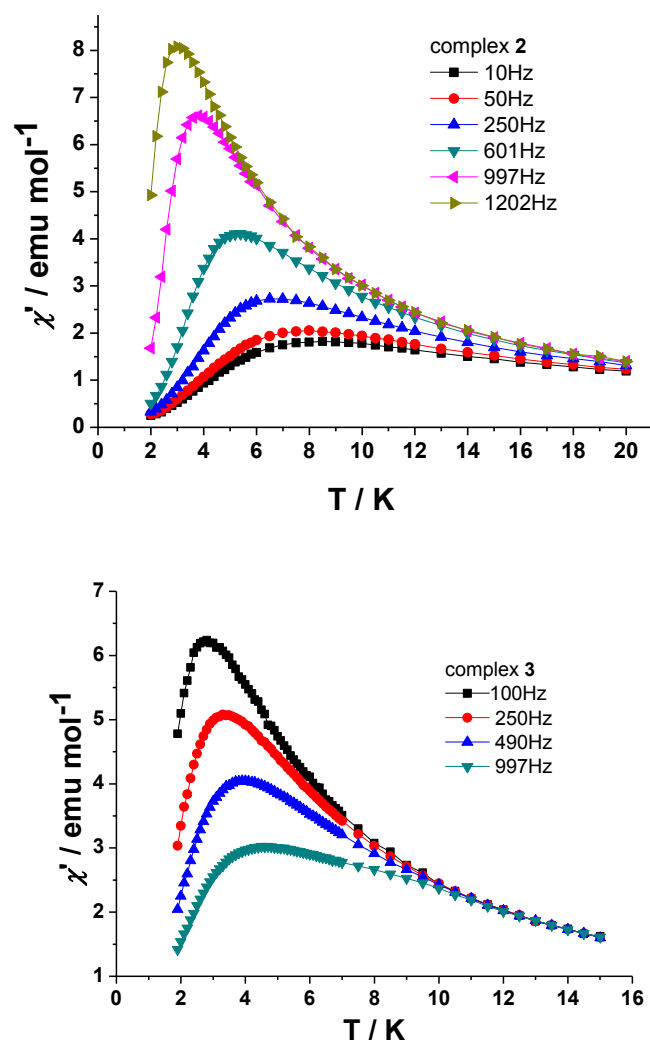

**Fig. S4.** Temperature dependence of in-phase susceptibility of complexes **2** (top) and **3** (bottom) under 2 kOe dc field.

**Table S1.** Relaxation Fitting Parameters from Least-Squares Fitting of  $\chi(\omega)$  data for Complex **2**

| $T$ (K) | $\chi_s$ | $\beta$ | $\alpha_1$ | $\tau_1$ | $\alpha_2$ | $\tau_2$ |
|---------|----------|---------|------------|----------|------------|----------|
| 2       | 0.19     | 0.39    | 2.83E-17   | 0.33     | 0.21       | 0.011    |
| 3       | 0.31     | 0.14    | 0.28       | 0.33     | 0.14       | 0.002    |
| 4       | 3.54E-15 | 0.80    | 0.10       | 0.00082  | 0.43       | 0.00029  |

**Table S2.** Relaxation Fitting Parameters from Least-Squares Fitting of  $\chi(\omega)$  data for Complex **3**

| $T$ (K) | $\chi_s$ | $\alpha$ | $\tau$ |
|---------|----------|----------|--------|
| 1.9     | 0.52     | 0.26     | 0.0072 |
| 2.2     | 0.61     | 0.24     | 0.0049 |
